P6361

### Prognostic value of discharge heart rate in acute heart failure patients: more relevant in atrial fibrillation?

R. Vidal-Perez<sup>1</sup>, R. Agra-Bermejo<sup>2</sup>, D. Pascual-Figal<sup>3</sup>, F. Gude Sampedro<sup>4</sup>, C. Abou Jokh<sup>1</sup>, J. Delgado Jimenez<sup>5</sup>, A. Varela-Roman<sup>2</sup>, I. Gomez Otero<sup>2</sup>, A. Ferrero-Gregori<sup>2</sup>, J. Alvarez-Garcia<sup>6</sup>, F. Worner Diz<sup>7</sup>, J. Segovia<sup>8</sup>, J. Cinca<sup>6</sup>, F. Fernandez-Aviles<sup>9</sup>, J.R. Gonzalez-Juanatey<sup>2</sup>

<sup>1</sup>University Hospital of Santiago de Compostela, Santiago de Compostela, Spain; <sup>2</sup>Hospital Universitario Santiago de Compostela, CIBERCV, Cardiology, Santiago de Compostela, Spain; <sup>3</sup>Hospital Universitario Virgen de la Arrixaca, Cardiology, Murcia, Spain; <sup>4</sup>Instituto de Investigacion Sanitaria de Santiago, Santiago de Compostela, Spain; <sup>5</sup>University Hospital 12 de Octubre, Madrid, Spain; <sup>6</sup>Hospital de la Santa Creu i Sant Pau, Cardiology, Barcelona, Spain; <sup>7</sup>Hospital Arnau de Vilanova, Lleida, Spain; <sup>8</sup>University Hospital Puerta de Hierro Majadahonda, Cardiology, Madrid, Spain; <sup>9</sup>University Hospital Gregorio Maranon, Cardiology, Madrid, Spain

On behalf of REDINSCOR II investigators

**Funding Acknowledgement:** Heart Failure Program of the Red de Investigación Cardiovascular del Instituto de Salud Carlos III, Madrid, Spain (RD12/0042) and the Fondo Europeo de

**Background:** The prognostic impact of heart rate (HR) in acute heart failure (AHF) patients is not well known especially in atrial fibrillation (AF) patients.

**Purpose:** The aim of the study was to evaluate the impact of admission HR, discharge HR, HR difference (HRD) (admission- discharge) in AHF patients with sinus rhythm (SR) or AF on long- term outcomes.

**Methods:** We included 1398 patients consecutively admitted with AHF between October 2013 and December 2014 from a national multicentric, prospective registry. Logistic regression models were used to estimate the association between admission HR, discharge HR and HR difference and one- year all-cause mortality and HF readmission.

**Results:** The mean age of the study population was 72±12 years. Of these,

594 (42.4%) were female, 655 (77.8%) were hypertensive and 655 (46.8%) had diabetes. Among all included patients, 745 (53.2%) had sinus rhythm and 653 (46.7%) had atrial fibrillation. Only discharge HR was associated with one-year all-cause mortality (Relative risk (RR)= 1.182, confidence interval (CI) 95% 1.024–1.366, p=0.022) in SR. In AF patients discharge HR was associated with one-year all-cause mortality (RR= 1.276, CI 95% 1.115–1.459, p≤0.001). We did not observe a prognostic effect of admission HR or HRD on long-term outcomes in both groups. This relationship is not dependent on left ventricular ejection fraction (Figure 1)

**Conclusions:** In AHF patients lower discharge HR, neither the admission nor the difference, is associated with better long-term outcomes especially in AF patients

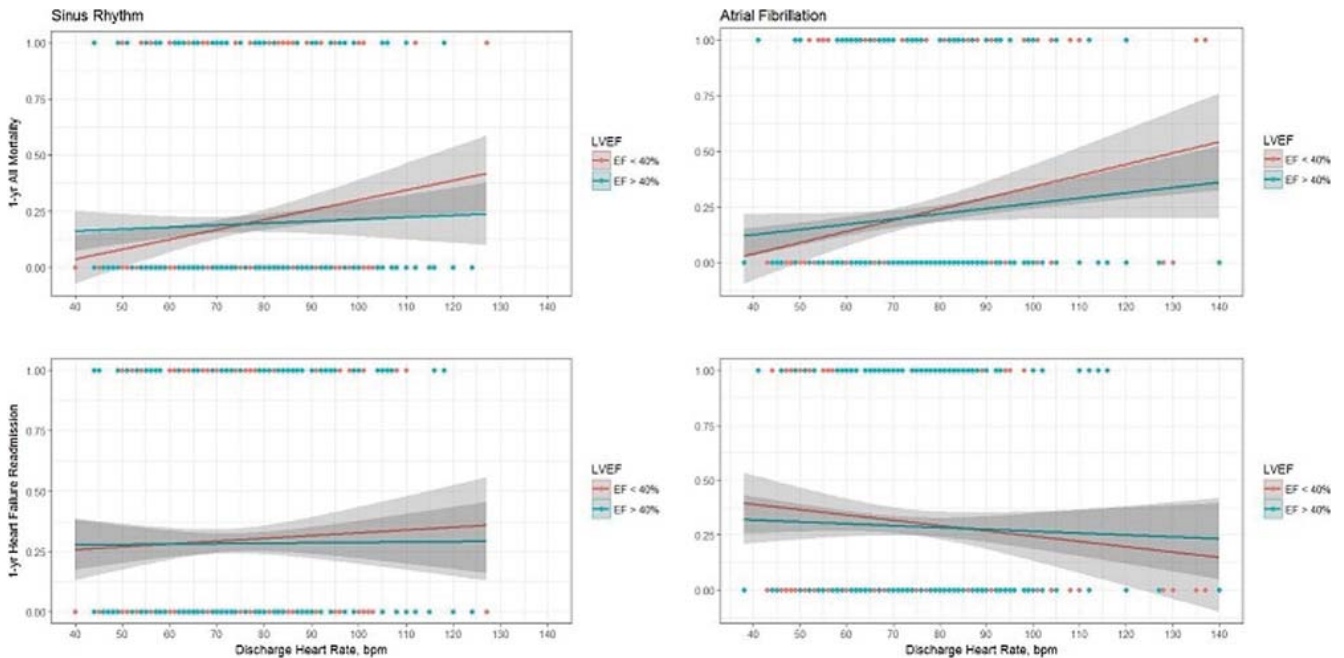

Effect of post-discharge heart rate
